# Supplementary material for: Bidirectional Control of Synaptic GABAAR Clustering by Glutamate and Calcium
Source: PubMed Central journal article supplement — Cell Rep. 2015 Dec 17;13(12):2768–80. doi: 10.1016/j.celrep.2015.12.002 (PMC4700050; doi:10.1016/j.celrep.2015.12.002), 2015-12-17
Supplement: mmc1.pdf [file mmc1.pdf]

Cell Reports

Supplemental Information

## **Bidirectional Control of Synaptic GABA<sub>A</sub>R**

### **Clustering by Glutamate and Calcium**

Hiroko Bannai, Fumihiro Niwa, Mark W. Sherwood, Amulya Nidhi Shrivastava, Misa Arizono, Akitoshi Miyamoto, Kotomi Sugiura, Sabine Lévi, Antoine Triller, and Katsuhiko Mikoshiba

1. Supplemental Experimental Procedures
2. Reference for Supplemental Experimental Procedures
3. Supplemental Figures and Legends
4. Supplemental Table

## 1. Supplemental Experimental Procedures

### Animals

All experiments in this study were carried out in accordance with the guidelines issued by the Japanese Ministry of Education, Culture, Sports, Science and Technology and approved by the Animal Experiment Committee of the RIKEN and Nagoya Univ. IP<sub>3</sub>R1 knock-out mice and Homozygous mRFP-gephyrin knock-in mice are described previously (Calamai et al., 2009; Matsumoto et al., 1996).

### Primary cultures of hippocampal neurons

Primary cultures of hippocampal neurons were prepared from E18–21 Wistar rat embryos as previously described (Goslin et al., 1998). Neurons were plated at a density of  $1.3 \times 10^4$  cells/cm<sup>2</sup> onto glass coverslips coated with 80 µg/ml poly-D, L-ornithine or 0.04% polyethyleneimine (Sigma). Cultures were maintained in Neurobasal medium supplemented with B27, 2 mM L-glutamine, and antibiotics (all from Life Technologies, CA, USA). Cells were cultured at 37°C in a 5% CO<sub>2</sub>. At least three independent cultures were used for each experiment at 21–27 days *in vitro* (DIV) unless described.

### Drug treatment

The following drugs were used: 2APB (100 µM; Daiichi Kagaku, Japan) to block IP<sub>3</sub>R channel activity, U73122 (1 µM; Calbiochem, CA, USA) to inhibit IP<sub>3</sub> production and MCPG (250 µM; Tocris, MO, USA) to antagonize mGluR activity, TTX (1 µM; Tocris) to block voltage gated Na<sup>+</sup> channel, NMDA (50 µM; Tocris), glycine (5 µM) and TTX (1 µM) cocktail to induce the Ca<sup>2+</sup> influx mediated dispersal of GABA<sub>A</sub>R, DHPG (5 µM; Tocris) to enhance mGluR activity, dynasore (80 µM; Tocris) to prevent dynamin-dependent endocytosis, CysA (1 µM; Santa Cruz, CA, USA) and FK506 (1 µM; Tocris) to inhibit calcineurin activity, Gö6976 (500 nM; Calbiochem) to inhibit Ca<sup>2+</sup> dependent PKC, PMA to activate PKC, and 4α-PMA as an inactive analogue of PMA (200 nM; Enzo Life Sciences inc. NY, USA). Stock solutions of 2APB, CysA, Gö6976, PMA and 4α-PMA were prepared in DMSO; other drugs were prepared in water. Neurons were acutely exposed to the different drugs for the indicated duration at 37°C in imaging medium comprising MEM without phenol red (Life Technologies), 20 mM HEPES, 33 mM glucose, 2 mM glutamine, 1 mM sodium pyruvate, and B27. To remove Ca<sup>2+</sup> in the imaging medium (Fig. S1 C-D), MEM were pre-incubated with chelating resin Chelex (Bio Rad) for 60 min at room temperature before adding other components.

### Immunocytochemistry and quantitative analysis

Immunochemical detection of GABA<sub>A</sub>Rγ2 subunit and gephyrin in cultured neurons was done as previously described (Bannai et al., 2009; Niwa et al., 2012). Endogenous GABA<sub>A</sub>Rγ2 subunits were labeled with a rabbit anti- GABA<sub>A</sub>Rγ2 subunits antibody (Niwa et al., 2012) by incubating live cells for 30 min at 37°C with 2.0 µg/ml of antibody diluted in imaging medium. Cells were then fixed for 15 min at room temperature (RT; 24–26°C) in paraformaldehyde (PFA; 4% w/v) solution prepared in PBS-0.02% NaN<sub>3</sub>. Cells were permeabilized with triton X-100 (0.1% v/v) for 3 min at RT and the nonspecific staining was blocked with bovine serum albumin (BSA; 5% w/v; Sigma-Aldrich, MO, USA) for 30 min at RT. Neurons were then incubated with the mouse anti-synapsin I antibody (1:3000; Synaptic Systems, Goettingen, Germany) or guinea pig anti-PKCα antibody (1 µg/ml; Frontier institute,

Japan) or guinea pig anti-PKC $\beta$ II antibody (1  $\mu$ g/ml; Frontier institute) or guinea pig anti-PKC $\gamma$  antibody (1  $\mu$ g/ml; Frontier institute) in 2.5% BSA for 60 min at RT. After washes, the cells were incubated for 30 min at RT in Alexa Fluor<sup>®</sup>-conjugated secondary antibodies (5–10  $\mu$ g/ml, Alexa Fluor 488 or Alexa Fluor 594; Life Technologies), washed, and mounted on slides with Vectashield (Vector Laboratories, CA, USA). For gephyrin labeling, cells were fixed immediately after the drug treatment and followed by permeabilization and blocking. Cells were incubated for 90 min at RT with the mouse anti-gephyrin antibody (0.33  $\mu$ g/ml, clone mAb7a; Synaptic Systems) and the rabbit polyclonal anti-synapsin I antibody (1:400; Merck Millipore, MA, USA). The primary antibodies were visualized with secondary Alexa Fluor 488 goat anti-mouse and Alexa Fluor 594 goat anti-rabbit antibodies (5–10  $\mu$ g/ml; Life Technologies).

Immunofluorescent images from isolated neurons were acquired on an inverted microscope (IX-70; Olympus, Tokyo, Japan) equipped with a Plan Apo 60 $\times$  oil immersion objective with a numerical aperture (NA) of 1.42 (Olympus), a cooled CCD camera (Orca-II-ER; Hamamatsu Photonics, Shizuoka, Japan), and appropriate filter sets for Alexa Fluor 488 (ex: 480  $\pm$  10 nm, em: 530  $\pm$  20 nm) and Alexa Fluor 594 (ex: 535  $\pm$  15 nm, em: 580 nm long pass). All images from the same culture were acquired with the same sub-saturation exposure time.

Quantification of synaptic GABA<sub>A</sub>R-, gephyrin-, synapsin and PKC-associated immunofluorescence was performed using “Integrated Morphometry Analysis” function of the MetaMorph software (Molecular Device Japan, Tokyo, Japan) as previously described (Bannai et al., 2009; Charrier et al., 2006; Levi et al., 2004; Levi et al., 2008; Niwa et al., 2012). GABA<sub>A</sub>R- and gephyrin-immunoreactive clusters and synapsin-positive presynapses were defined by processing images with multidimensional image analysis (MIA) interface, i.e., a 2D object segmentation by wavelet transform (Racine et al., 2007) and “auto threshold for light object (isodata method)” function of MetaMorph. Synaptic GABA<sub>A</sub>R or gephyrin clusters were defined as clusters that overlapped at least 1 pixel with presynaptic terminals. The fluorescence intensity of GABA<sub>A</sub>R or gephyrin clusters was defined as the mean fluorescence intensity per cluster multiplied by the mean area per cluster. For PKC immunofluorescence showing diffuse labeling, we measured the fluorescence intensity per pixel of PKC overlapping with GABA<sub>A</sub>R clusters. All the data reported here showed same tendency in independent experiments using more than 3 independent culture sets. For population data, data values from 10 or more cells were divided by the average of control levels for that batch, and pooled for statistical analysis.

### **Time-lapse imaging of mRFP-gephyrin cluster**

Time-lapse video microscopy was performed on hippocampal neuron cultures prepared from mRFP-gephyrin expressing knock-in mice (Machado et al., 2011) and as described before (Hanus et al., 2006). Experiments were performed on 19-20 DIV neurons and MEM recording medium (Phenol red-free MEM, 33 mM glucose, 20 mM HEPES, 2 mM glutamine, 1 mM sodium pyruvate, and 1 $\times$  B27) was used. Time-lapse imaging was carried out on an inverted Nikon Eclipse Ti microscope equipped with a 100 $\times$  oil-immersion objective (NA 1.49) and excitation / emission filter (FF01-560/25 / FF01-607/36, Semrock) using an Andor iXon EMCCD camera (image pixel size, 160 nm, 300 ms exposure time) in a controlled environment maintained at 35°C.

### **Electrophysiology**

Whole cell patch clamp experiments on primary cultured neurons were carried out with following solutions. The internal solution contained (in mM): CsCl<sub>2</sub>, 140; EGTA, 0.2; HEPES, 10; Mg-ATP, 2; GTP-Tris, 1; Na-phosphocreatine, 2.5 (pH 7.2-7.3, 280-290 mOsm). The extracellular recording solution contained (in mM): NaCl, 147; KCl, 2.1; HEPES, 8.8; D-glucose, 8.8; CaCl<sub>2</sub>, 1.1; MgCl<sub>2</sub>, 1.1; Pyruvic Acid, 0.026%(v/v) (pH 7.4, 310 mOsm).

Hippocampal brain slices were prepared from postnatal day 14 to 21 BL56/J IP3R1<sup>-/-</sup> mice and WT littermates. Mice were anesthetized with isoflurane and decapitated, and the brain was rapidly removed and transferred to ice cold cutting solution containing in mM: Choline-Cl, 120; KCl, 3; D-Glucose, 20; MgCl<sub>2</sub>, 8; NaH<sub>2</sub>PO<sub>4</sub>, 1.25; NaHCO<sub>3</sub>, 26; bubbled with 95% O<sub>2</sub>/5% CO<sub>2</sub>. Acute slices (300 μm thick) were cut on a VT1000S Vibratome (Leica), transferred at 34°C for 15-20min to artificial cerebrospinal fluid (aCSF) containing in mM: NaCl, 125; KCl, 2.5; D-Glucose, 25; CaCl<sub>2</sub>, 2; MgCl<sub>2</sub>, 1; NaH<sub>2</sub>PO<sub>4</sub>, 1.25; NaHCO<sub>3</sub>, 25; 320 mOsm, bubbled with 95% O<sub>2</sub>/5% CO<sub>2</sub>, pH 7.35. Slices were allowed to recover, for at least one hour at RT before use. For experiments on acute slice, the internal solution contained (in mM): CsCl<sub>2</sub>, 130; EGTA, 10; CaCl<sub>2</sub>, 1; MgCl<sub>2</sub>, 1; HEPES, 10; Mg-ATP, 2; GTP-Tris, 0.1; Na-phosphocreatine, 2.5 (pH 7.4, 290-300 mOsm). The extracellular recording solution was the aCSF solution.

Spontaneous mIPSCs were recorded in the whole-cell voltage-clamp configuration, in the presence of 2,3-Dihydroxy-6-nitrobenzo[f]quinoxaline-7-sulfonamide (NBQX, 10 μM), D-2-Amino-5-phosphonopentanoic acid (D-AP5, 50 μM), and TTX (1 μM). When required the extracellular recording solution was supplemented with 250 μM MCPG or vehicle (NaOH). Whole-cell patch pipettes (3-5 MΩ) were pulled on a P-97 Micropipette Puller (Sutter Instruments), coated with sylgard-184/R6101 (Dow Corning), and filled with internal solution. All experiments were performed at room temperature.

Whole-cell recordings were obtained using Axopatch 200B (Axon Instruments) amplifier and acquired with a Digidata1322A A/D converter (Axon Instruments) controlled by pClamp 9 (Axon Instruments). Signals were low-pass filtered at 5/10 kHz and acquired at 50/100 kHz. Series resistance and capacitance were corrected/compensated 70-80%. The membrane potential was held at -70 mV (junction potential left uncorrected). Under these recording conditions GABAergic chloride currents were recorded as inward currents. Detection of individual mIPSC was performed offline using the template-matching event detection algorithm in Clamp fit 9.2 (Axon Instruments). To avoid bias due to a different number of events from each recording, the same number of mIPSC events for each cell was taken from the beginning of the recording, for statistical analysis.

### **Production of a rabbit GABA<sub>A</sub>R β3 subunit antiserum**

The rabbit anti-GABA<sub>A</sub>R β3 subunit antibody (anti-GABA<sub>A</sub>R β3) was raised as described previously (Todd et al., 1996). Purified fusion protein consisting of maltose-binding protein (MBP) and amino acids 345–408 of the mouse GABA<sub>A</sub>R β3, part of intracellular loop between transmembrane domains M3 and M4, were injected into rabbits to raise the antibody by the Support Unit for Animal Resources Development at the RIKEN BSI RRC. To obtain fusion proteins, the DNA sequence corresponding to amino acid 345-408 of the GABA<sub>A</sub>R β3 was amplified by PCR using FANTOM3 clone C630014N19 from RIKEN Genomic Sciences Research Complex as a template (Carninci et al., 2005), and subcloned into pMAL-C vector (New England Biolabs, MA, USA). Recombinant MBP fusion proteins were expressed in *E. coli* BL21 and purified with amylose resin (New England Biolabs).

The specificity of this antibody was confirmed by Western Blot using cell lysates from HeLa cells (RIKEN BioResource Center, Ibaraki, Japan) transfected with plasmids encoding the α1, β3, and γ2 GABA<sub>A</sub>R subunits (Niwa et al., 2012) or from extracts of rat hippocampal primary cultures (Fig. S5C). HeLa cells were cultured in DMEM supplemented with 10% fetal bovine serum and transfected using TransIT-LT1 as described previously (Niwa et al. 2012). Confluent (70–80%) HeLa cells cultured on 18 mm coverslips were lysed with 100 μl SDS-PAGE sampling buffer, while rat hippocampal primary cultures were lysed with RIPA buffer as described previously (Bannai et al., 2009) (see “**Surface biotinylation assay**”). The Western blot was done with 1 μg of proteins from 5 μl of cell lysates and using the rabbit GABA<sub>A</sub>R β3 serum at 1:2000.

### **Surface biotinylation assay**

Surface biotinylation assay was carried out as previously described (Bannai et al., 2009; Saliba et al., 2007). Neurons were washed twice in PBS (1 mM CaCl<sub>2</sub> and 0.5 mM MgCl<sub>2</sub>), and incubated for 30 min in 0.25 mg/ml sulfo-NHS-SS-biotin (Pierce) followed by 20 min washes in 100 mM glycine to quench excess biotin. Then neurons were lysed in radioimmunoprecipitation assay (RIPA) buffer: 50 mM Tris-HCl (pH7.5), 150 mM NaCl, 1% NP-40, 0.5% sodium deoxycholate, 0.1% SDS, 10 mM EDTA, protease inhibitor cocktail (Roche). Detergent-soluble extracts (150 µg) were incubated for 2 h with immobilized NeutrAvidin (Pierce, 60 µl 1:1 slurry) to purify biotinylated proteins. All steps were done at 4°C.

### **Western blot**

Neurons were treated by SDS sample buffer: 62.5 mM TrisHCl, pH 6.8, 10 (w/v) % glycerol, 2% SDS, 5 (v/v) % β-ME, 0.05% BPB. The following primary antibodies were used: rabbit anti-GABA<sub>A</sub>R β3 antiserum (1:2000), rabbit anti-PKCα antiserum (1:100,000; Sigma-Aldrich), guinea pig anti-PKCβII antibody (200 ng/ml; Frontier institute) or guinea pig anti-PKCγ antibody (200 ng/ml concentration; Frontier institute). The primary antibodies were revealed using horseradish peroxidase (HRP)-coupled goat anti-rabbit IgG (1:5000; GE Healthcare Japan, Tokyo, Japan) or goat anti-guinea pig IgG (1:5000; Cappel, CA, USA). Chemiluminescence from HRP reacted to Immobilon Western Chemiluminescent HRP Substrate (Merck Millipore) were detected by Imagequant LAS-4000 mini (GE healthcare) and quantified using Image J.

### **Ca<sup>2+</sup> imaging**

Ca<sup>2+</sup> imaging was performed as described previously (Niwa et al., 2012). Neurons were incubated with 0.5 µM fluo-4 AM (Life Technologies) for 5 min at 37°C for loading. Fluo-4 signal was acquired at 0.2 Hz with a 200-ms exposure at room temperature (24–26°C), under an inverted microscope (IX-70; Olympus, JP) equipped with a 40× objective (NA 0.85, UPlanApo; Olympus), a cooled CCD camera (Orca-II-ER; Hamamatsu Photonics), and filters (ex, 480 ± 10 nm; em, 530 ± 20 nm). The ratio of the fluorescence intensities F/F<sub>0</sub>, where F is a fluorescence intensity and F<sub>0</sub> is the intensity at t = 0, was obtained after subtraction of the background fluorescence.

### **QD-SPT experiments**

QD labeling and SPT of GABA<sub>A</sub>Rs and mGluR5s were performed as previously described (Bannai et al., 2006). Neurons were incubated with our rabbit anti-GABA<sub>A</sub>Rγ2 antibody (2.0 µg/ml) or anti-mGluR5 antibody (1.9–2.8 µg/ml) for 5 min, washed, and incubated with the biotinylated anti-rabbit Fab antibody (2.2 µg/ml; Jackson ImmunoResearch, PA, USA) for 5 min. Following washes, the coverslips were incubated with 1.0 nM streptavidin-coated QDs emitting at 605 nm or 625 nm (Life Technologies) in borate buffer for 1 min. After washes, functional presynaptic boutons were labeled with 2 µM FM4-64 (Life Technologies) in imaging medium containing 40 mM KCl for 15 s. Incubation with antibodies and washes were performed at 37°C in imaging medium.

Recording of GABA<sub>A</sub>R-QD behavior and FM4-64 signals was performed at 37°C in the imaging medium using an inverted microscope (IX-70, -71 or -73 Olympus) equipped with an oil immersion objective (60×, NA > 1.42, Olympus) and a cooled-CCD camera (ORCA-II-ER, Hamamatsu Photonics) or an EM-CCD camera (Cascade, Roper Scientific; Imagem, Hamamatsu Photonics). Fluorescent signals were detected using appropriate filter sets for QD (ex: 455 ± 70 nm, em: 605 ± 20 nm) and FM4-64 (ex: 535 ± 15 nm, em: 580 nm long pass). QD movies were recorded with an integration time of 76 ms with 512 consecutive frames

(38.9 s), or 200 frames for IP<sub>3</sub>R1KO neurons. All recordings were finished within 30 min after labeling.

### SPT data analysis

QD-SPD data were analyzed using TI workbench software written by Dr. T. Inoue (Waseda University) as described previously (Bannai et al., 2009; Niwa et al., 2012). GABA<sub>A</sub>R-QD localization was determined by fitting QD images with a Gaussian model of the point spread function, and the trajectories were reconstructed. Only signals from single QDs with blinking were analyzed. The synaptic area was defined by processing FM4-64 images with wavelet decomposition (Racine et al., 2007). “synaptic” GABA<sub>A</sub>R-QD trajectories were defined when they overlap with synaptic area + 2 pixels (284 nm). The GABA<sub>A</sub>R-QD dwell time inside the synapse was defined as the duration of synaptic sub-trajectories.

Diffusion parameters, such as the diffusion coefficient and confinement size, were obtained from the mean square displacement (MSD) plot versus time (MSD- $n\tau$  plot) that were calculated for GABA<sub>A</sub>R-QD trajectory by applying the following equation:

$$MSD(n\tau) = \frac{1}{N-n} \sum_{i=1}^{N-n} \left[ \left( x((i+n)\tau) - x(i\tau) \right)^2 + \left( y((i+n)\tau) - y(i\tau) \right)^2 \right] \text{ (Eq. 1)}$$

((Saxton and Jacobson, 1997)), where  $x_i$  and  $y_i$  are the positions of GABA<sub>A</sub>R-QD in frame  $i$ ,  $N$  is the total frame number,  $\tau$  is the acquisition time in one frame (76 ms), and  $n\tau$  is duration over which the displacement is calculated. Diffusion coefficients ( $D$ ) were calculated by fitting first four points excluding the origin of the MSD- $n\tau$  plot with the following equation:

$$MSD(n\tau) = 4Dn\tau + b \text{ (Eq. 2),}$$

where  $b$  is a constant representing localization accuracy (Ehrensperger et al., 2007). The confinement domain size was obtained by fitting the MSD- $n\tau$  plot to the following equation:

$$MSD(n\tau) = \frac{L^2}{3} \left( 1 - \exp\left(-\frac{12Dn\tau}{L^2}\right) \right) + 4D_{mac}n\tau \text{ (Eq. 3)}$$

(Kusumi et al., 1993), where  $L^2$  is the estimated maximal area of diffusion when diffusion is confined, and  $D_{mac}$  is the diffusion coefficient on a long time scale. The diffusion of GABA<sub>A</sub>R-QD with MSD- $n\tau$  plot that does not apply  $|D-D_{mac}| < 0.1 \times D$  or  $L < 0.001$  was defined as restricted motion, and only GABA<sub>A</sub>R-QDs meeting this criteria were considered for calculations of confinement domain sizes (Ehrensperger et al., 2007). The sub-trajectories shorter than 29 frames were excluded for the calculation of  $D$  and  $L$ .

### GABA<sub>A</sub>R $\gamma$ 2 mutant analysis

The GABA<sub>A</sub>R  $\gamma$ 2L subunit was sub-cloned into pCDNA3.1zeo(+) as described previously (Niwa et al., 2012), and a *PstI* site, corresponding to amino acid LQ, were introduced between amino acids 4 and 5 of  $\gamma$ 2L as previously described (Kittler et al., 2000). A Myc-epitope sequence (EQKLISEEDL) was then inserted into this *PstI* site to allow specific QD labeling of mutant  $\gamma$ 2L through the myc tag. Point mutations on S327/343 (Fig.S7A) were introduced as described previously (Sawano and Miyawaki, 2000). Plasmid DNAs were transfected using Lipofectamine 2000 (Life technologies) at 3-4 DIV and QD-SPT was carried out 2 days after transfection. To label GABA<sub>A</sub>R $\gamma$ 2 mutants, anti-Myc tag antibody, clone 4a6 (1:500, Merck Millipore) and biotinylated anti-mouse Fab antibody (2.6  $\mu$ g/ml; Jackson ImmunoResearch, PA, USA) were used.

### Statistical analysis and image preparation

Statistical analyses were performed using the Mann–Whitney  $U$  test, Welch’s  $t$ -test, and Tukey’s range test in ANOVA, with KaleidaGraph (Synergy Software, PA, USA). The numbers of QDs analyzed are shown in Table S1. Images were prepared for printing using

MetaMorph, TI Workbench, Microsoft Excel, Adobe Photoshop, and Adobe Illustrator.

## 2. Reference for Supplemental Experimental Procedures

- Bannai, H., Levi, S., Schweizer, C., Dahan, M., and Triller, A. (2006). Imaging the lateral diffusion of membrane molecules with quantum dots. *Nat Protoc* *1*, 2628-2634.
- Bannai, H., Levi, S., Schweizer, C., Inoue, T., Launey, T., Racine, V., Sibarita, J.B., Mikoshiba, K., and Triller, A. (2009). Activity-dependent tuning of inhibitory neurotransmission based on GABAAR diffusion dynamics. *Neuron* *62*, 670-682.
- Calamai, M., Specht, C.G., Heller, J., Alcor, D., Machado, P., Vannier, C., and Triller, A. (2009). Gephyrin oligomerization controls GlyR mobility and synaptic clustering. *J Neurosci* *29*, 7639-7648.
- Carninci, P., Kasukawa, T., Katayama, S., Gough, J., Frith, M.C., Maeda, N., Oyama, R., Ravasi, T., Lenhard, B., Wells, C., *et al.* (2005). The transcriptional landscape of the mammalian genome. *Science* *309*, 1559-1563.
- Charrier, C., Ehrensperger, M.V., Dahan, M., Levi, S., and Triller, A. (2006). Cytoskeleton regulation of glycine receptor number at synapses and diffusion in the plasma membrane. *J Neurosci* *26*, 8502-8511.
- Ehrensperger, M.V., Hanus, C., Vannier, C., Triller, A., and Dahan, M. (2007). Multiple association states between glycine receptors and gephyrin identified by SPT analysis. *Biophys J* *92*, 3706-3718.
- Goslin, K., Asmussen, H., and Banker, G. (1998). Rat hippocampal neurons in low-density culture. In *Culturing nerve cells*, G. Banker, and K. Goslin, eds. (Cambridge: MIT press), pp. 339-370.
- Kittler, J.T., Wang, J., Connolly, C.N., Vicini, S., Smart, T.G., and Moss, S.J. (2000). Analysis of GABAA receptor assembly in mammalian cell lines and hippocampal neurons using gamma 2 subunit green fluorescent protein chimeras. *Mol Cell Neurosci* *16*, 440-452.
- Kusumi, A., Sako, Y., and Yamamoto, M. (1993). Confined lateral diffusion of membrane receptors as studied by single particle tracking (nanovid microscopy). Effects of calcium-induced differentiation in cultured epithelial cells. *Biophys J* *65*, 2021-2040.
- Levi, S., Logan, S.M., Tovar, K.R., and Craig, A.M. (2004). Gephyrin is critical for glycine receptor clustering but not for the formation of functional GABAergic synapses in hippocampal neurons. *J Neurosci* *24*, 207-217.
- Levi, S., Schweizer, C., Bannai, H., Pascual, O., Charrier, C., and Triller, A. (2008). Homeostatic regulation of synaptic GlyR numbers driven by lateral diffusion. *Neuron* *59*, 261-273.
- Matsumoto, M., Nakagawa, T., Inoue, T., Nagata, E., Tanaka, K., Takano, H., Minowa, O., Kuno, J., Sakakibara, S., Yamada, M., *et al.* (1996). Ataxia and epileptic seizures in mice lacking type 1 inositol 1,4,5-trisphosphate receptor. *Nature* *379*, 168-171.
- Niwa, F., Bannai, H., Arizono, M., Fukatsu, K., Triller, A., and Mikoshiba, K. (2012). Gephyrin-independent GABA(A)R mobility and clustering during plasticity. *PLoS One* *7*, e36148.
- Racine, V., Sachse, M., Salamero, J., Fraisier, V., Trubuil, A., and Sibarita, J.B. (2007). Visualization and quantification of vesicle trafficking on a three-dimensional cytoskeleton network in living cells. *J Microsc* *225*, 214-228.
- Saliba, R.S., Michels, G., Jacob, T.C., Pangalos, M.N., and Moss, S.J. (2007). Activity-dependent ubiquitination of GABA(A) receptors regulates their accumulation at synaptic sites. *J Neurosci* *27*, 13341-13351.
- Sawano, A., and Miyawaki, A. (2000). Directed evolution of green fluorescent protein by a new versatile PCR strategy for site-directed and semi-random mutagenesis. *Nucleic Acids Res* *28*, E78.

- Saxton, M.J., and Jacobson, K. (1997). Single-particle tracking: applications to membrane dynamics. *Annu Rev Biophys Biomol Struct* 26, 373-399.
- Todd, A.J., Watt, C., Spike, R.C., and Sieghart, W. (1996). Colocalization of GABA, glycine, and their receptors at synapses in the rat spinal cord. *J Neurosci* 16, 974-982.



## 4. Supplemental Figures and Legends

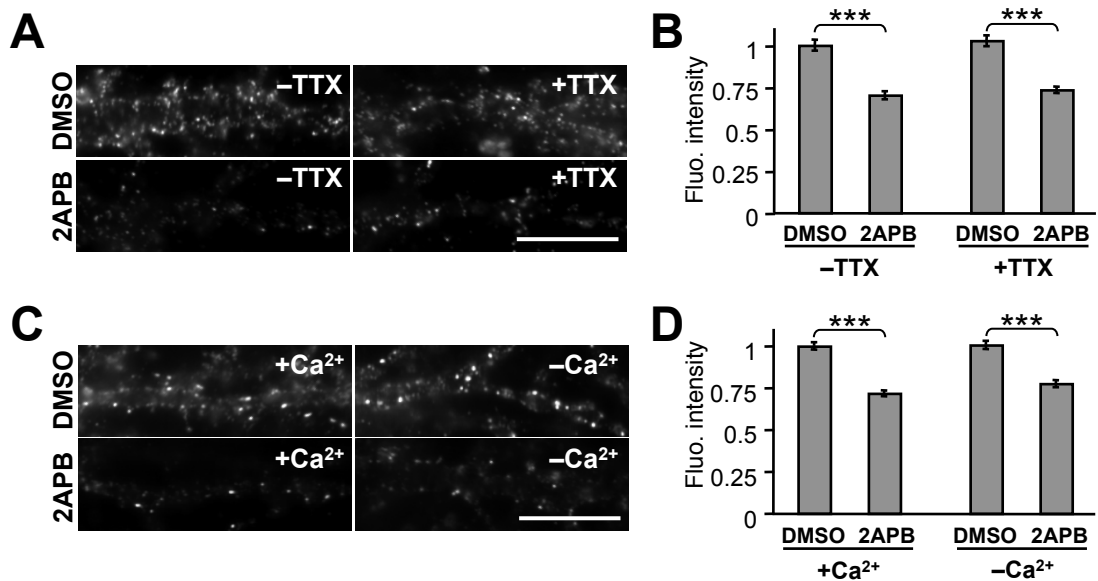

**Figure S1. 2APB-induced synaptic GABA<sub>A</sub>R decrease is independent of synaptic activity and Ca<sup>2+</sup> influx**

**A:** Staining for GABA<sub>A</sub>Rγ2 of neurons treated with DMSO or 2APB for in the absence or the presence of TTX. **B:** Fluorescent intensities normalized to DMSO without TTX condition (average ± SEM) of synaptic GABA<sub>A</sub>Rγ2. **C:** GABA<sub>A</sub>Rγ2 cluster after 60 min DMSO or 2APB treatment with or without external Ca<sup>2+</sup>. **D:** Normalized fluorescence (average ± SEM) of synaptic GABA<sub>A</sub>Rγ2. Average fluorescence DMSO with Ca<sup>2+</sup> condition was assigned as 1. Scale bars: 10 μm. \*\*\*:  $p < 0.005$ , Welch's  $t$ -test,  $n = 29-30$  cells/condition.

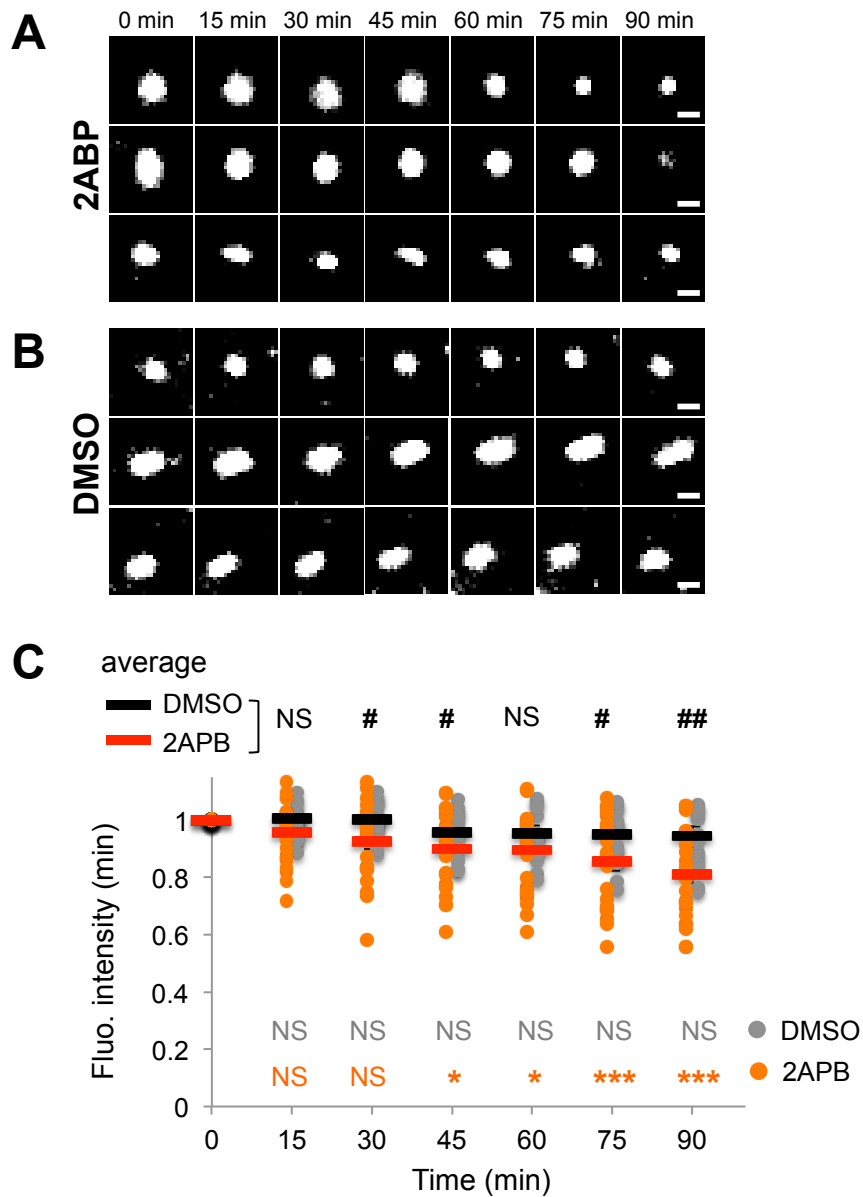

**Figure S2. Time-lapse imaging of mRFP-gephyrin clusters**

Cultured hippocampal neurons (19-20 DIV) from mRFP-gephyrin knock-in mice treated with 2ABP (100  $\mu$ M, **A**) or DMSO (**B**). Three representative mRFP-gephyrin clusters shown for 2ABP (**A**) or DMSO (**B**). Scale: 1  $\mu$ m.

**C**: Time-dependent reduction in cluster fluorescence intensity following 2ABP (orange) but not DMSO (grey) treatment. Bars indicate average value (black: DMSO, red: 2APB).

Bottom: one-way ANOVA with Dunnett's post-hoc test to compare difference from 0 min (grey for DMSO, red for 2APB \* :  $p < 0.05$  / \*\*\* :  $p < 0.001$ , NS: non-significant.  $n$  = number of movies, DMSO: 15; 2APB: 24). Top: Unpaired t-test with Welch's correction between DMSO and 2APB for different time-points (# :  $p < 0.05$ , ## :  $p < 0.01$ , NS: non-significant).

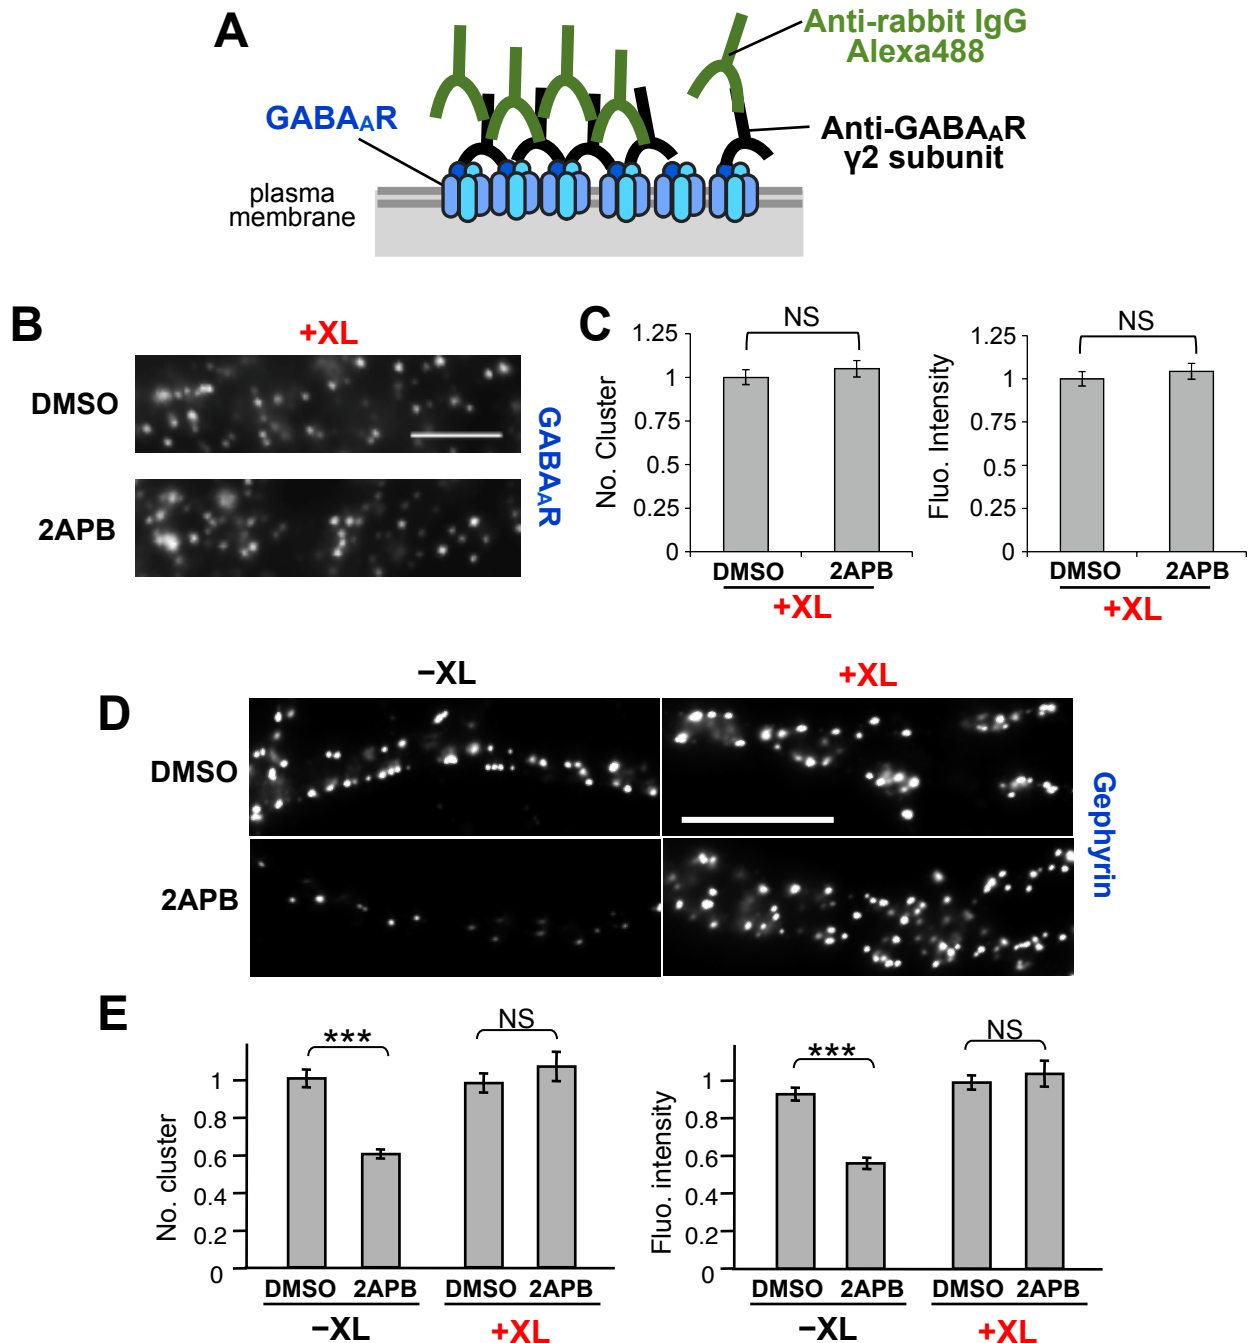

**Figure S3. Suppression of 2APB-induced reduction in gephyrin immunofluorescence by GABA<sub>A</sub>R immobilization by GABA<sub>A</sub>R crosslinking (XL)**

**A:** Diagram of crosslinking (XL). **B:** Examples of GABA<sub>A</sub>R-immunoreactive clusters in dendrites with or without surface GABA<sub>A</sub>R cross-linking (+XL) treated with DMSO or 2APB for 90 min. Scale bar, 5  $\mu$ m. **C:** Effects of GABA<sub>A</sub>R XL and 2APB treatment on the normalized number of clusters (left) and normalized fluorescence intensities (right) of gephyrin clusters (averages  $\pm$  SEM)  $n = 30$  cells/condition (3 cultures). XL of surface GABA<sub>A</sub>R completely inhibited 2APB-induced GABA<sub>A</sub>R declustering. **B:** Examples of gephyrin-immunoreactive clusters in dendrites with (+XL) or without (-XL) surface GABA<sub>A</sub>R cross-linking treated with DMSO or 2APB for 90 min. Note that 2APB-induced declustering of gephyrin was inhibited by surface GABA<sub>A</sub>R XL. Scale bar, 5  $\mu$ m. **C:** Effects of GABA<sub>A</sub>R XL and 2APB treatment on the normalized number of clusters (left) and normalized fluorescence intensities (right) of gephyrin clusters (averages  $\pm$  SEM).  $n = 30$  cells/condition (3 cultures). NS:  $p > 0.05$ ; \*\*\*:  $p < 0.005$ , Welch's  $t$ -test, 2APB-induced reduction in gephyrin cluster size was completely suppressed by GABA<sub>A</sub>R XL.

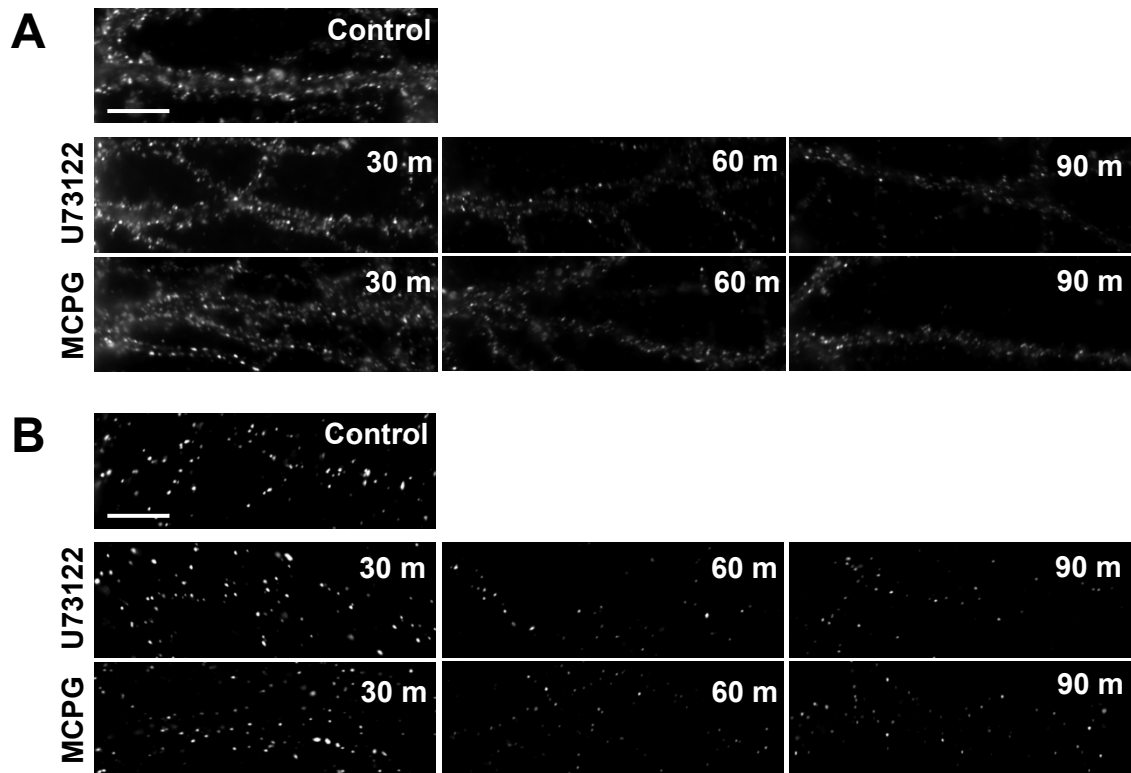

**Figure S4. Prolonged blockade of IICR pathway results in declustering of GABA<sub>A</sub>R and gephyrin clusters.**

Representative examples of immunoreactivity associated with GABA<sub>A</sub>R (A) and gephyrin (B) in the dendrite or rat hippocampal neurons (DIV21–27) of control and those treated 1  $\mu$ M U73122 and 250  $\mu$ M MCPG for 30, 60 and 90 min. Scale bar, 10  $\mu$ m. For quantitative data, see Fig. 2B and D.

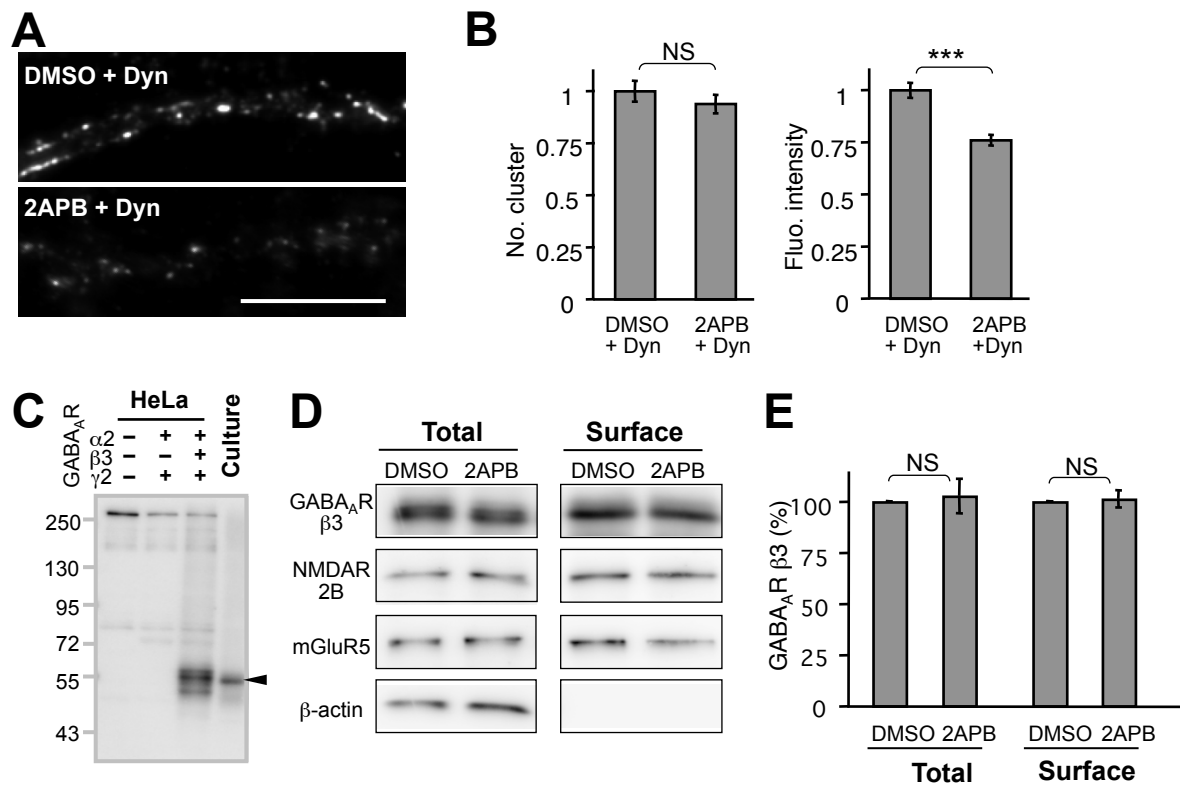

**Figure S5. 2APB-induced synaptic GABA<sub>A</sub>R reduction is independent of receptor internalization.**

**A-B:** 2APB-induced reduction in synaptic GABA<sub>A</sub>R cluster size was observed even in the absence of dynamin-dependent receptor endocytosis. Staining for GABA<sub>A</sub>Rγ2 of neurons treated with DMSO or 2APB for in the presence of 80 μM dynasore, a membrane-permeant dynamin inhibitor.

**A:** Examples of GABA<sub>A</sub>R cluster. Scale bars: 10 μm. **B:** Normalized number of clusters and fluorescent intensity (average ± SEM) of synaptic GABA<sub>A</sub>Rγ2. NS:  $p > 0.05$ , \*\*\*:  $p < 0.005$ , Welch's  $t$ -test,  $n = 30-35$  cells/condition. **C:** Westernblot analysis with HeLa cells and rat hippocampal culture lysate using our custom-made anti-GABA<sub>A</sub>R β3 antiserum. 55 kDa band (arrowhead) was detected in HeLa cells transfected with plasmids encoding GABA<sub>A</sub>R α2, β3, and γ2 subunits and hippocampal culture lysate, but not in non-transfected HeLa cells and those expressing only α2 and γ2 subunits. **D:** Amount of surface expressed biotinylated GABA<sub>A</sub>R β3 subunit, NMDAR2B subunit, and mGluR5 are not modified by 60 min 2APB treatment.

Biotinylated membrane proteins (surface) isolated from detergent soluble fraction (total) with immobilized Neutraavidin, immunoblotted with antibodies against GABA<sub>A</sub>Rβ3, NMDAR2B, and actin. **E:** Quantification of total and surface expressed GABA<sub>A</sub>Rβ3 on DMSO and 2APB- treated cells. Protein level of DMSO condition was assigned as 100%. Both total and surface amount of β3 subunit was equivalent to that in control cells. NS:  $p > 0.05$  Welch's  $t$ -test,  $n=9$ .

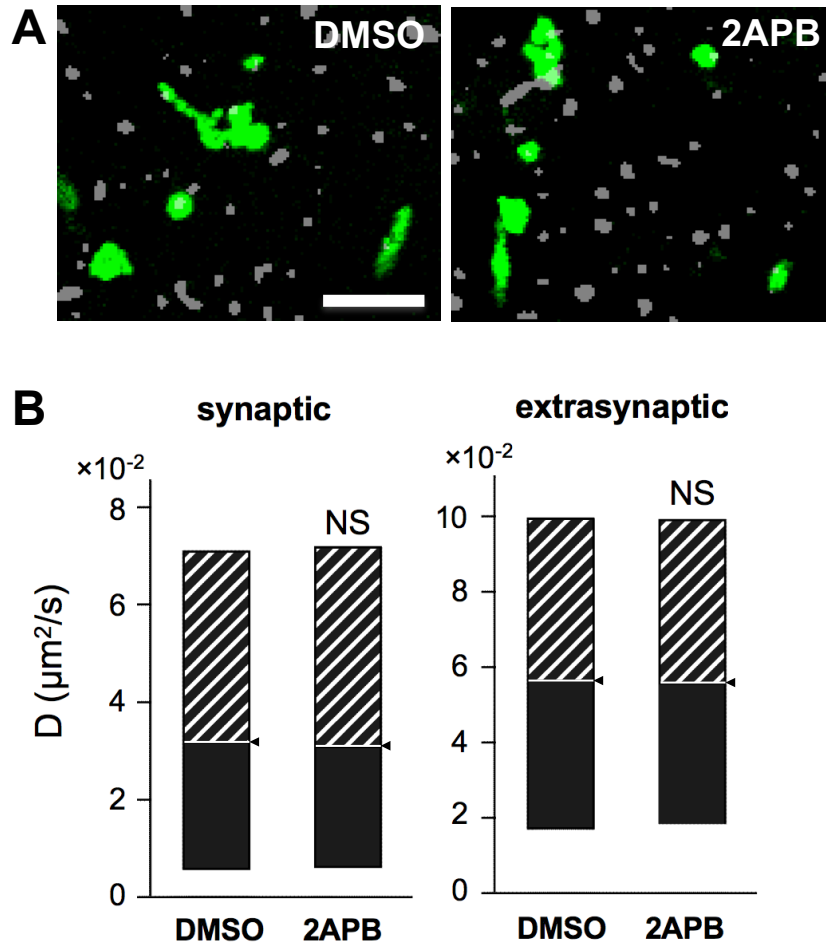

**Figure S6. Minor effect of long-term 2APB treatment on lateral diffusion of neuronal mGluR5.**

**A:** Examples of mGluR5-QD trajectories (green), reconstructed from recording sequences of 38.4 s overlaid with FM4-64 signals (gray) in order to identify synapses. Scale bar: 5  $\mu\text{m}$ .

**B:** Diffusion coefficients (median  $\pm$  IQR) of mGluR5-QDs inside (left) and outside (right) the synapse after 60-90 min 2APB treatment. NS:  $p > 0.05$ , Mann-Whitney  $U$  test. 2APB treatment did not significantly affect the diffusion coefficient of mGlu5s.

**A**

WT(S327/343): <sup>325</sup> KPSKDKDKKKKNPLLRF<sup>345</sup>SFK  
 S327A: KPAKDKDKKKKNPLLRF<sup>345</sup>SFK  
 S327E: KPEKDKDKKKKNPLLRF<sup>345</sup>SFK  
 S327/343A: KPAKDKDKKKKNPLLRF<sup>345</sup>AFK  
 S327/343E: KPEKDKDKKKKNPLLRF<sup>345</sup>EFK

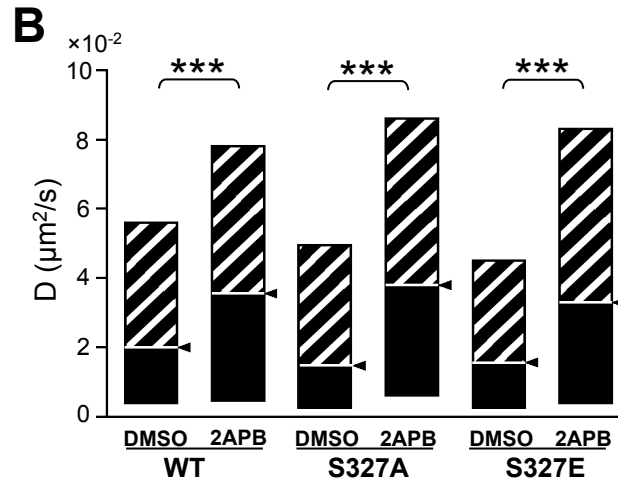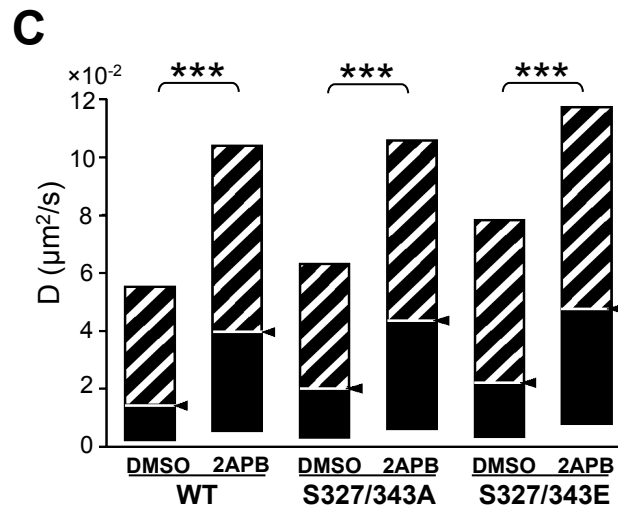

**Figure S7. Phosphorylation of S327/343 in GABA<sub>A</sub>R γ2 subunit is insufficient to prevent the increase of GABA<sub>A</sub>R lateral diffusion caused by inhibition of IICR.**

**A:** Amino acid sequences of a part of cytoplasmic loop region of GABA<sub>A</sub>R γ2 subunit. Serine residues shown in brown are S327 and S343 which were mutated into alanine (A, blue) or glutamate (E, magenta). **B:** Impact of 1 h 2APB treatment on diffusion coefficients (median±IQR) of GABA<sub>A</sub>R<sub>s</sub> with or without phospho-mimic mutation in S327. **C:** Diffusion coefficients (median±IQR) of GABA<sub>A</sub>R with WT, S327/343A, and S327/343E after 1 h treatment with DMSO or 2APB. \*\*\*:  $p < 0.005$ , Mann-Whitney  $U$  test. Cells were analyzed at 5-6 DIV.

## 5. Supplemental Table

**Table S1. Number of analyzed GABA<sub>A</sub>R-QD-trajectories.**

| <b>Fig. No</b> | <b>Treatment</b>                     | <b>D<br/>(Synaptic)</b>              | <b>D (Extra-<br/>synaptic)</b> | <b>Dwell time</b> | <b>Conf. size</b> |
|----------------|--------------------------------------|--------------------------------------|--------------------------------|-------------------|-------------------|
| Fig. 5A–D      | <b>DMSO 0-30 min</b>                 | 352                                  | 793                            | 1337              | 189               |
|                | <b>2APB 0-30 min</b>                 | 404                                  | 797                            | 1623              | 219               |
| Fig. 5E–H      | <b>DMSO 60-90 min</b>                | 1031                                 | 1540                           | 4091              | 593               |
|                | <b>2APB 60-90 min</b>                | 867                                  | 1253                           | 3761              | 455               |
| Fig. 5I–L      | <b>WT</b>                            | 268                                  | 550                            | 839               | 137               |
|                | <b>IP<sub>3</sub>R1KO</b>            | 260                                  | 637                            | 679               | 122               |
| Fig. 5M–P      | <b>Control 60-90 min</b>             | 487                                  | 650                            | 1640              | 294               |
|                | <b>MCPG 60-90 min</b>                | 672                                  | 900                            | 2425              | 323               |
| Fig. 5Q–T      | <b>DMSO+CysA</b>                     | 748                                  | n. d.                          | 3109              | 443               |
|                | <b>2APB+CysA</b>                     | 791                                  |                                | 2978              | 470               |
|                | <b>DMSO+FK506</b>                    | 377                                  |                                | 1383              | 209               |
|                | <b>2APB+FK506</b>                    | 428                                  |                                | 1494              | 248               |
| Fig. 7B–E      | <b>DMSO</b>                          | 480                                  | n. d.                          | 2097              | 269               |
|                | <b>Gö6976</b>                        | 688                                  |                                | 3739              | 334               |
| Fig. 7F–I      | <b>4<math>\alpha</math>-PMA+DMSO</b> | 601                                  | n. d.                          | 2155              | 322               |
|                | <b>4<math>\alpha</math>-PMA+2APB</b> | 458                                  |                                | 1947              | 219               |
|                | <b>PMA+DMSO</b>                      | 546                                  |                                | 1889              | 303               |
|                | <b>PMA+2APB</b>                      | 546                                  |                                | 1831              | 328               |
| Fig.S6         | <b>DMSO</b>                          | 370                                  | 795                            | n. d.             | n. d.             |
|                | <b>2APB</b>                          | 421                                  | 853                            |                   |                   |
| <b>Fig. No</b> | <b>Treatment</b>                     | <b>D (Synaptic + Extra-synaptic)</b> |                                |                   |                   |
| Fig. S7B       | <b>WT-DMSO</b>                       | 896                                  |                                |                   |                   |
|                | <b>WT-2APB</b>                       | 646                                  |                                |                   |                   |
|                | <b>S327A-DMSO</b>                    | 751                                  |                                |                   |                   |
|                | <b>S327A-2APB</b>                    | 666                                  |                                |                   |                   |
|                | <b>S327E-DMSO</b>                    | 750                                  |                                |                   |                   |
|                | <b>S327E-2APB</b>                    | 739                                  |                                |                   |                   |
| Fig. S7C       | <b>WT-DMSO</b>                       | 1046                                 |                                |                   |                   |
|                | <b>WT-2APB</b>                       | 1167                                 |                                |                   |                   |
|                | <b>S327/343A-DMSO</b>                | 1083                                 |                                |                   |                   |
|                | <b>S327/343A-2APB</b>                | 1274                                 |                                |                   |                   |
|                | <b>S327/343E-DMSO</b>                | 853                                  |                                |                   |                   |
|                | <b>S327/343E-2APB</b>                | 1651                                 |                                |                   |                   |
